# Supplementary material
Source: publisher figshare collection journal article supplement (https://tandf.figshare.com/articles/dataset/_/20286832)
Supplement: Supplementary file 1 [file 2]

Archive with 6 entries (6 files):
- ipsc_a_2096112_sm4003.pdf
- ipsc_a_2096112_sm3982.pdf
- ipsc_a_2096112_sm3633.pdf
- ipsc_a_2096112_sm3437.pdf
- ipsc_a_2096112_sm3243.pdf
- ipsc_a_2096112_sm3156.pdf
