# Supplementary material
Source: publisher figshare collection journal article supplement (https://tandf.figshare.com/articles/dataset/_/20286832)

# Type of symptom

Depressive (Hypo)manic Psychotic

# Symptom present according to medical chart

No Unascertained Yes

# Substance abuse

No Yes

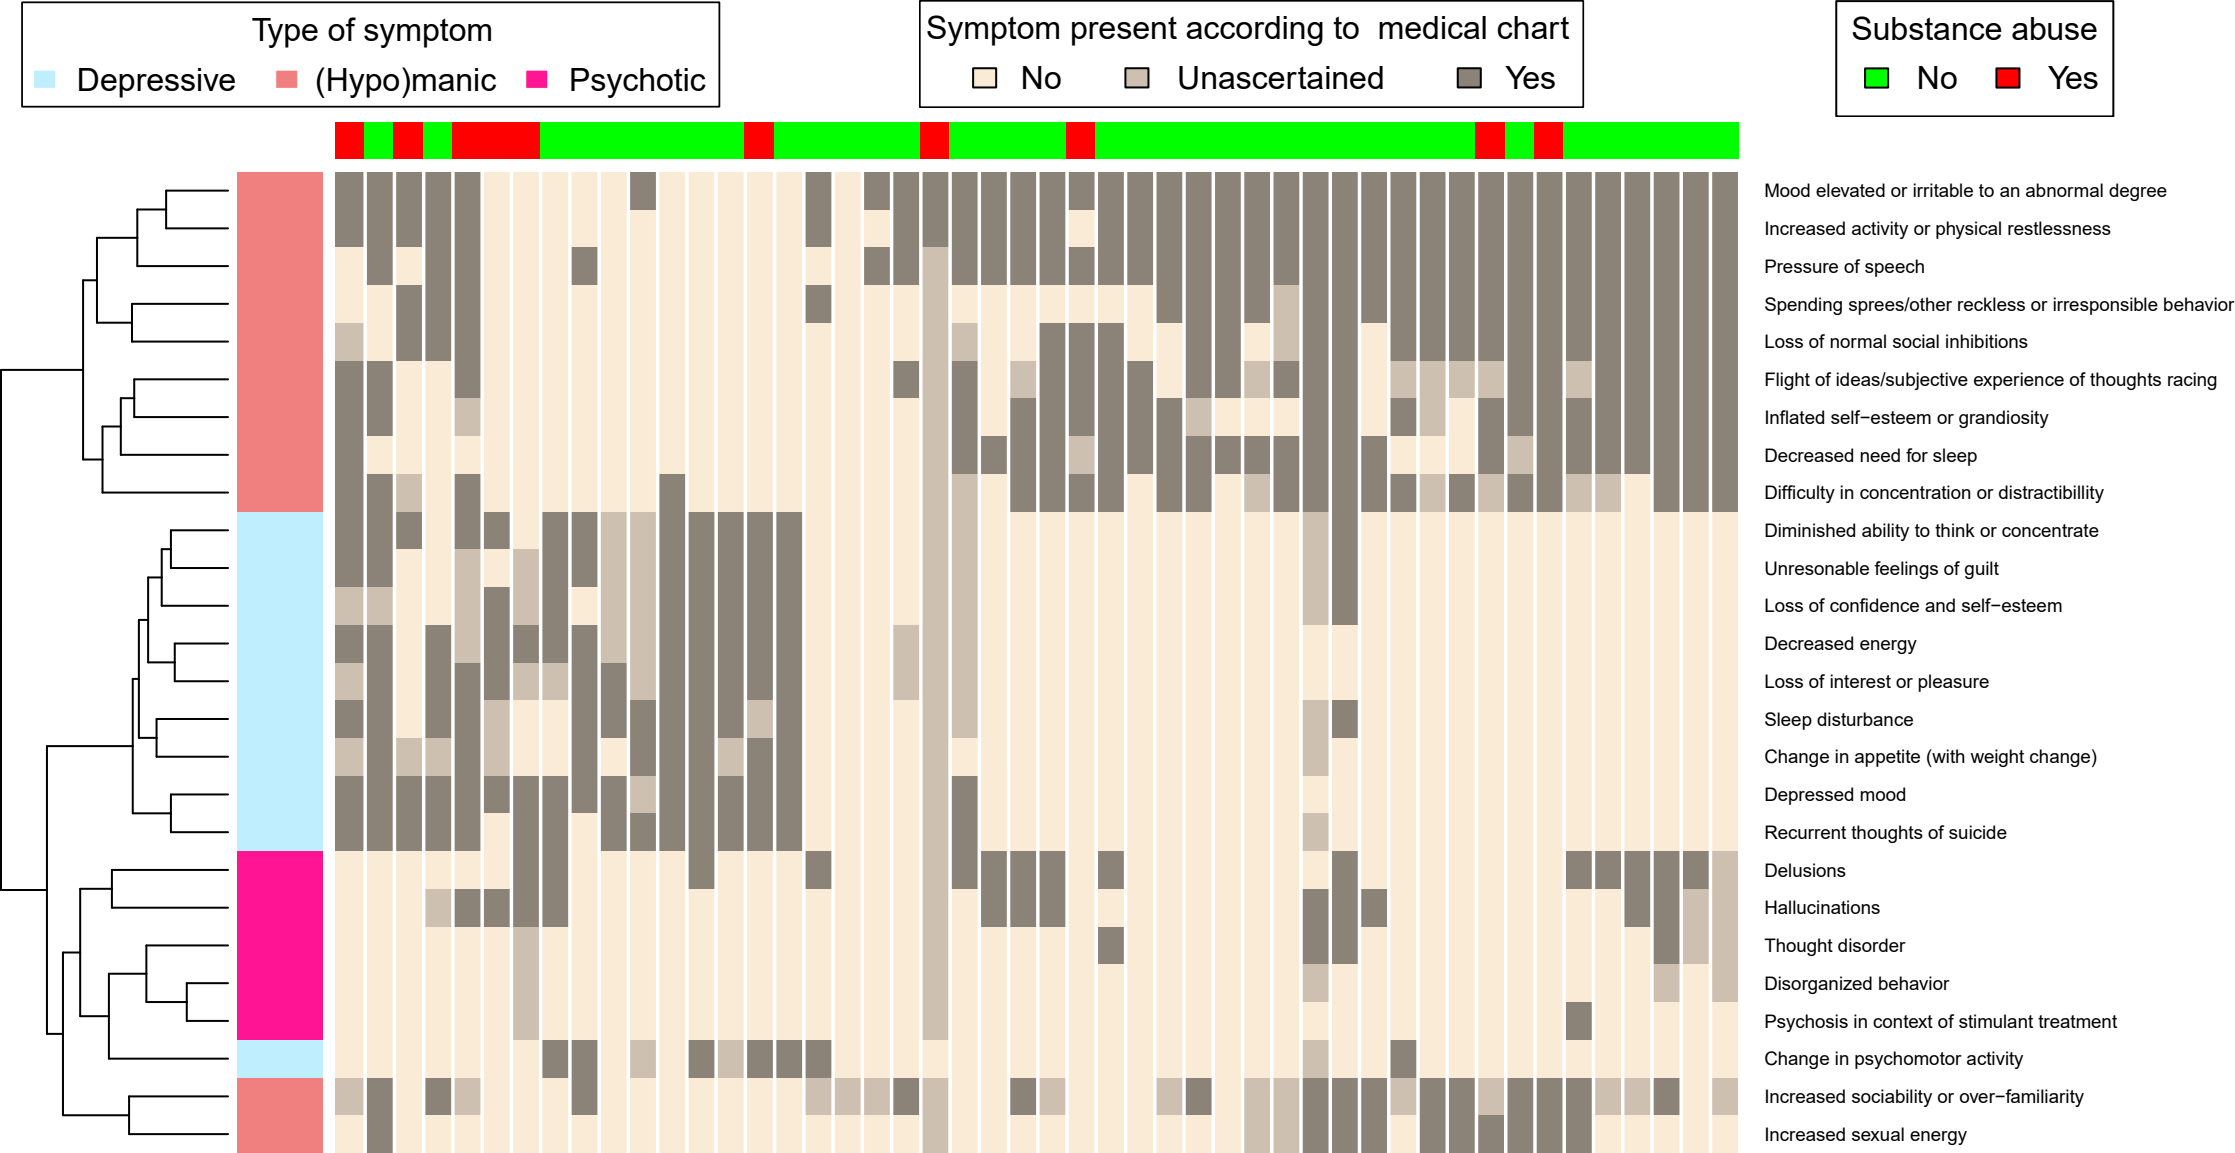

Supplement: Supplementary file 1 [file 2 › ipsc_a_2096112_sm3633.pdf]
