# Supplementary material
Source: publisher figshare collection journal article supplement (https://tandf.figshare.com/articles/dataset/_/20286832)

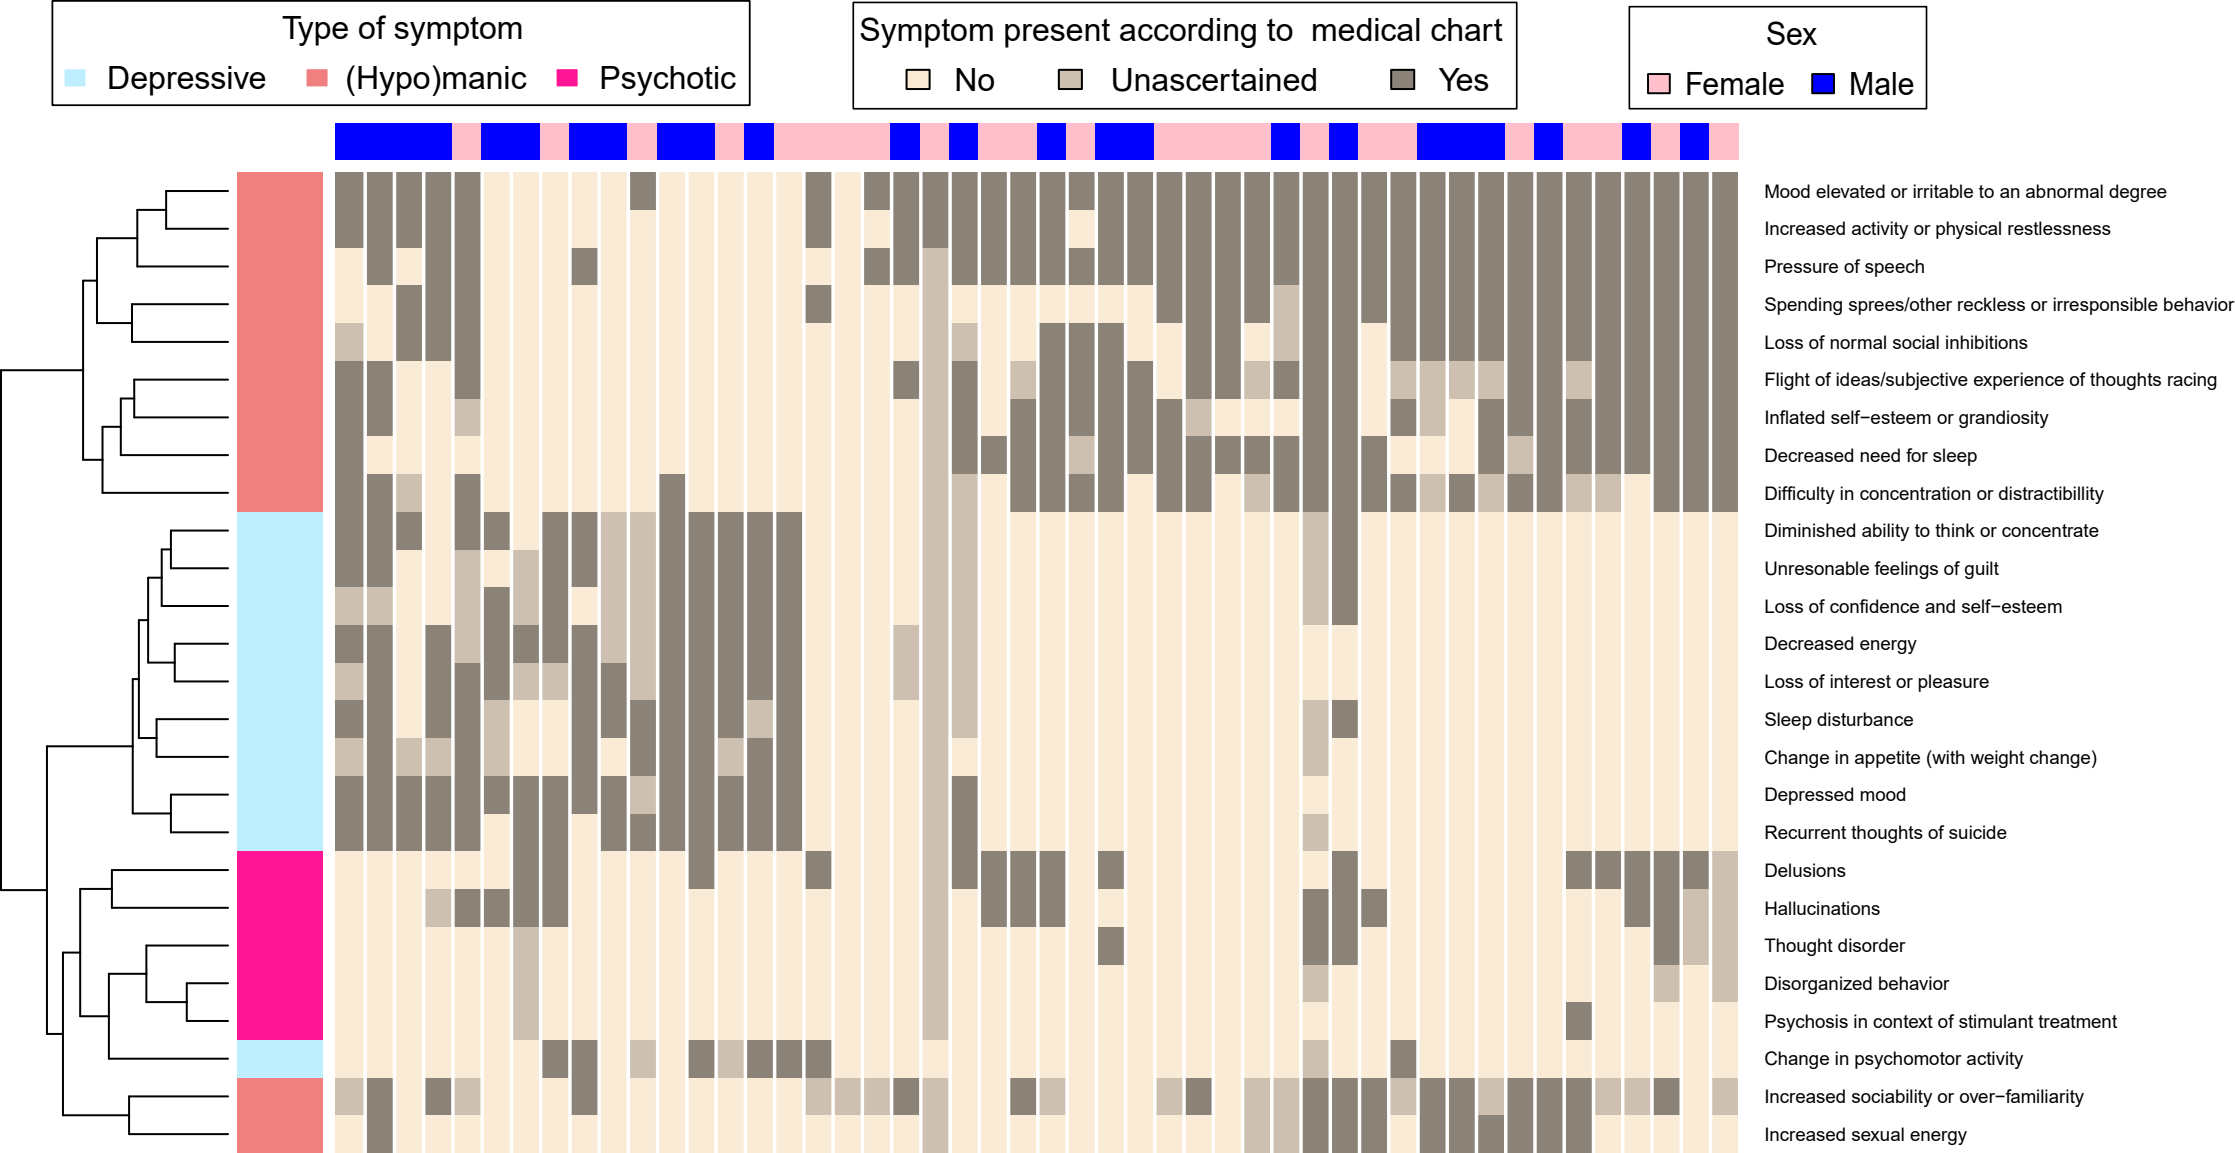

Supplement: Supplementary file 1 [file 2 › ipsc_a_2096112_sm4003.pdf]

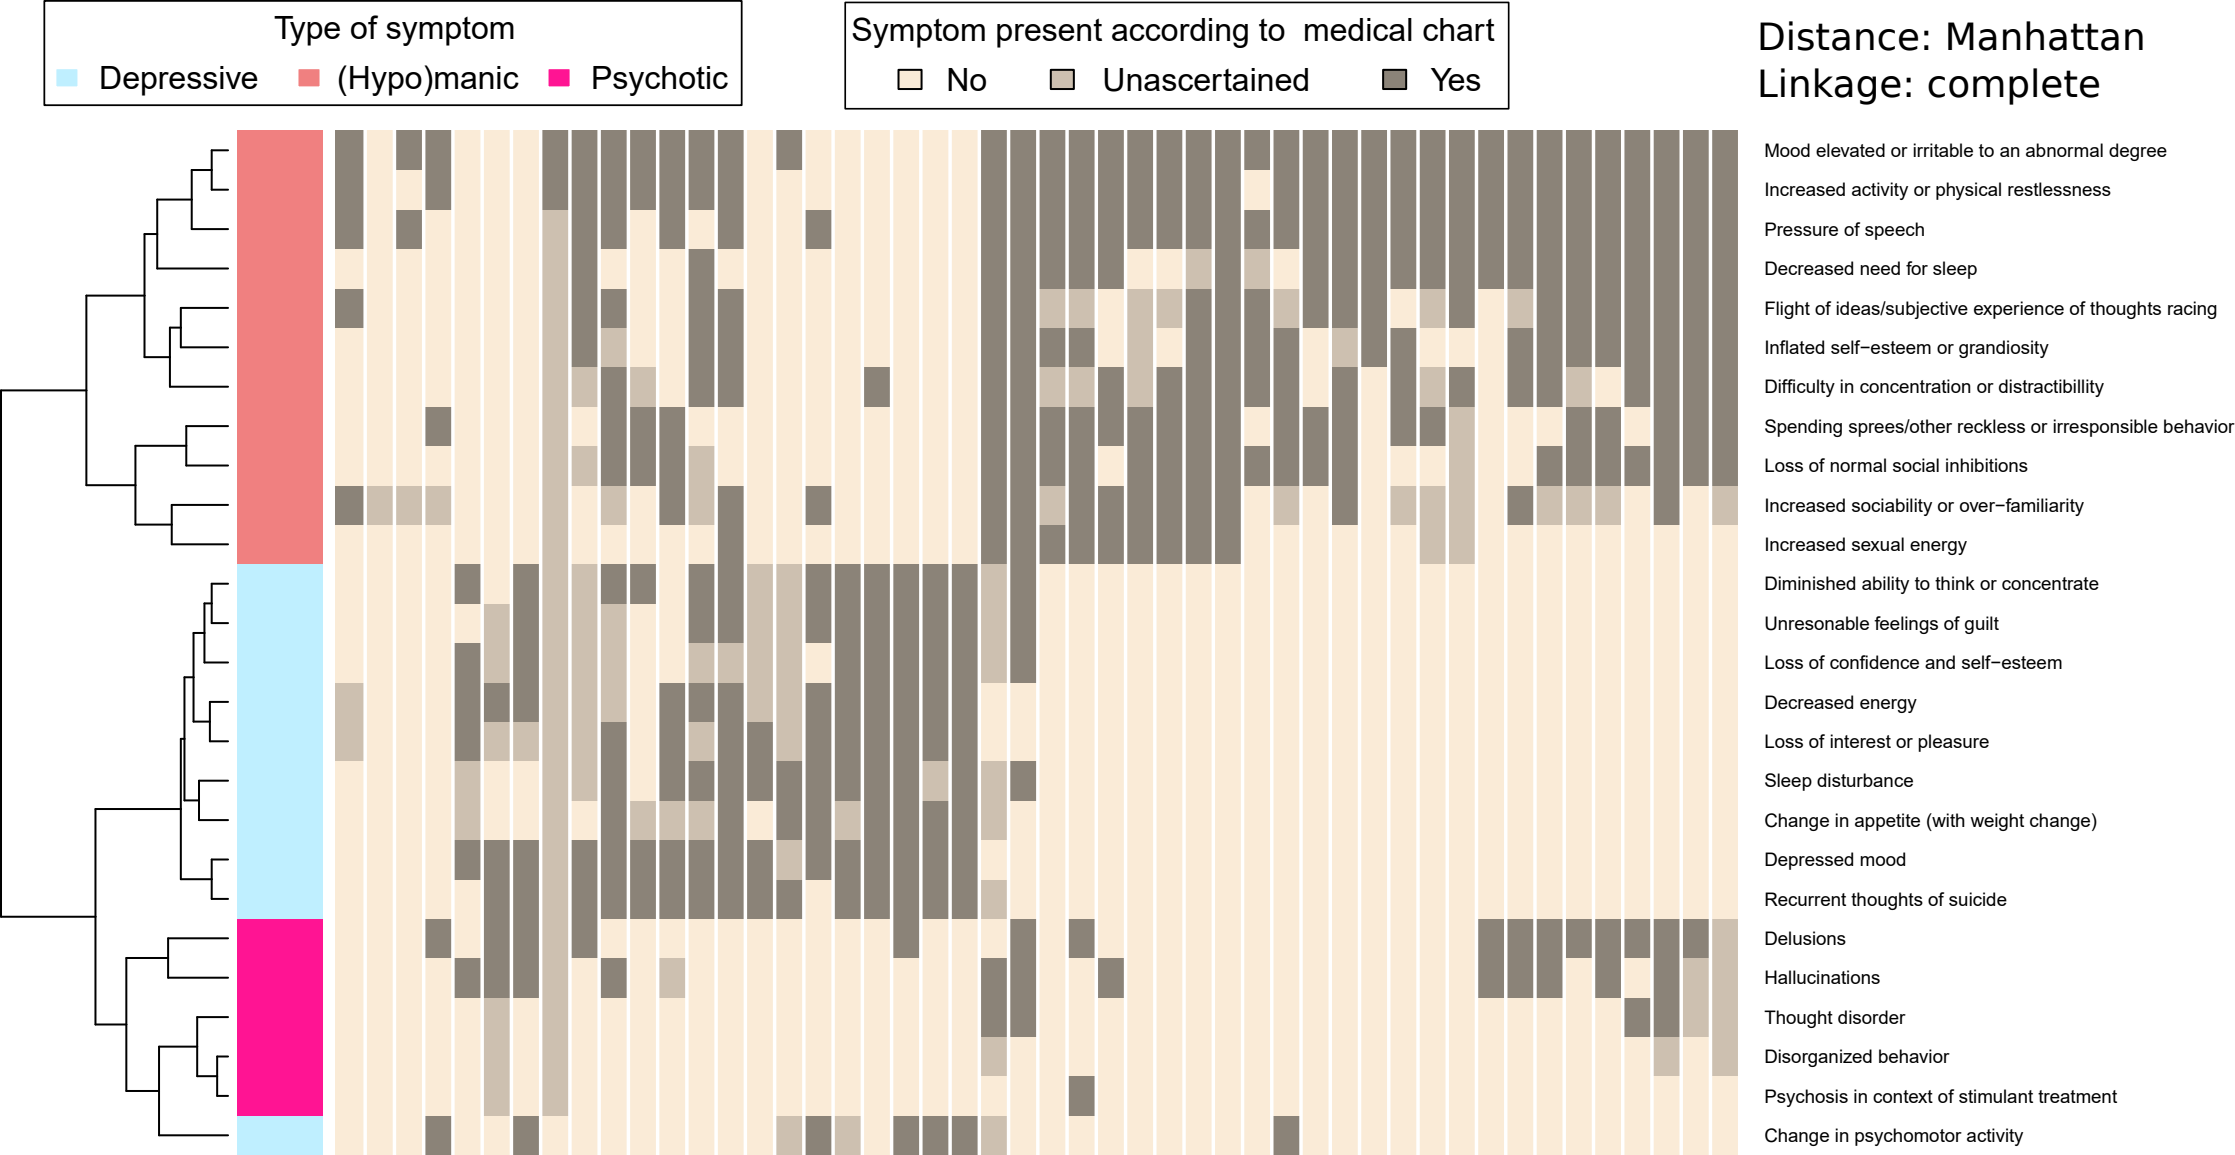

Supplement: Supplementary file 1 [file 2 › ipsc_a_2096112_sm3437.pdf]

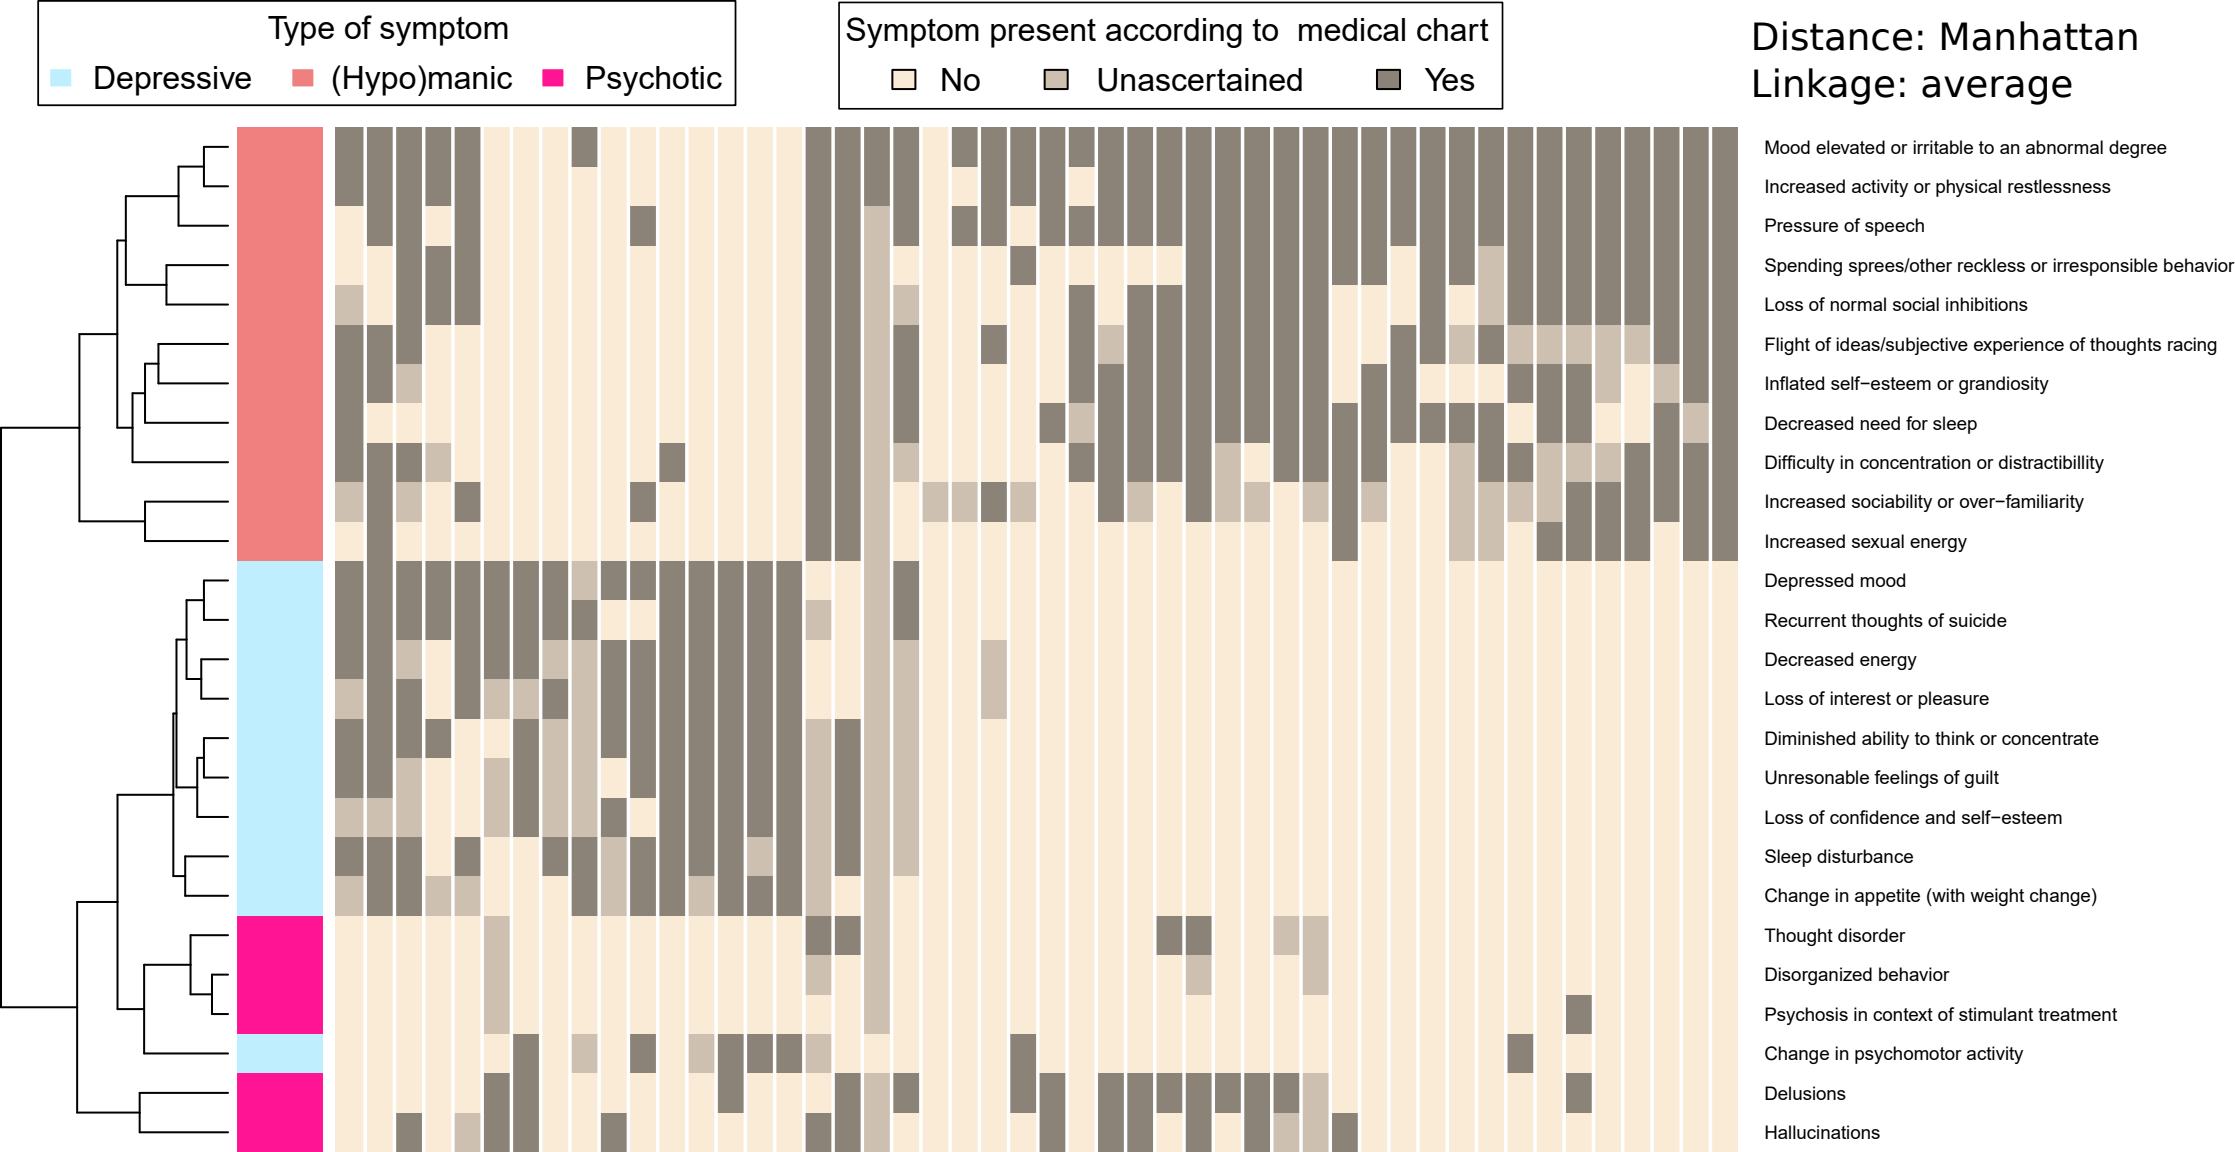

Supplement: Supplementary file 1 [file 2 › ipsc_a_2096112_sm3156.pdf]
